# Supplementary material for: Manipulation of cross-linking in PEDOT:PSS hydrogels for biointerfacing
Source: Royal Society of Chemistry journal article supplement (doi:10.1039/d3tb01415k), 2023-01-01
Supplement: d3tb01415k1.pdf [file d3tb01415k1.pdf]

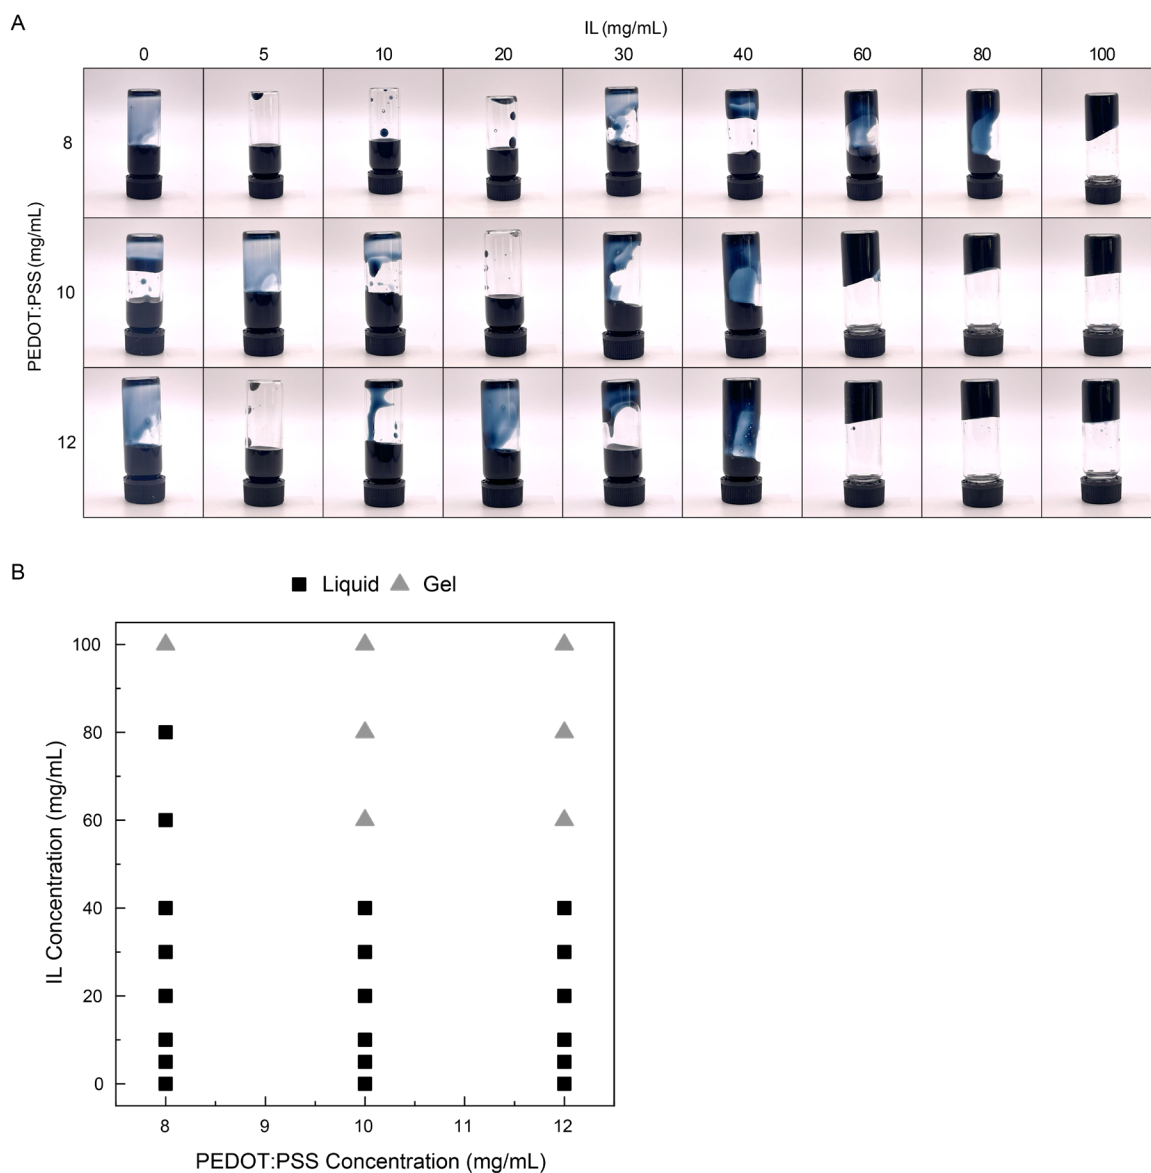

**Supporting Figure 1. Qualitative assessment of PEDOT:PSS-IL mixture phase and gelation kinetics.** A) Photos of tube inversions of 27 formulations used for generating B) a scatter plot of mixture phase, liquid or gel at 15 minutes after IL addition. The formulations with the most diluted PEDOT:PSS (8 mg/mL) were gels at 100 mg/mL IL while the formulations using 10 and 12 mg/mL PEDOT:PSS were gels at 60 mg/mL IL and above. All formulations investigated below these thresholds were liquids. N=1 per formulation.

**Supporting Table 1.** Table of values of PEDOT:PSS-IL mixture properties at 20 min after IL addition from representative plots of oscillatory and rotational rheology data presented in Figures 2 and 3.

| IL conc (mg/mL) | G' (Pa) | G'' (Pa) | tan( $\delta$ ) | Phase  | G'-G'' Cros-over (min) | Viscosity (Pa.s) |
|-----------------|---------|----------|-----------------|--------|------------------------|------------------|
| 10              | 0.00132 | 0.0398   | 30.1            | Liquid | NA                     | 0.0284           |
| 20              | 0.0570  | 0.192    | 3.37            | Liquid | 62.3                   | 0.0530           |
| 30              | 0.321   | 0.444    | 1.38            | Liquid | 25.4                   | 0.0726           |
| 40              | 0.895   | 0.823    | 0.919           | Gel    | 19.6                   | 0.111            |
| 60              | 3.63    | 1.60     | 0.440           | Gel    | NA                     | NA               |
| 80              | 12.8    | 2.39     | 0.187           | Gel    | NA                     | NA               |
| 100             | 16.4    | 2.93     | 0.179           | Gel    | NA                     | NA               |

**Supporting Table 2.** Table of values of PEDOT:PSS-IL mixture properties at 75 min after IL addition from representative plots of oscillatory and rotational rheology data presented in Figure 2.

| IL conc (mg/mL) | G' (Pa) | G'' (Pa) | tan( $\delta$ ) | Phase  |
|-----------------|---------|----------|-----------------|--------|
| 10              | 0.0170  | 0.0897   | 5.27            | Liquid |
| 20              | 0.766   | 0.626    | 0.818           | Gel    |
| 30              | 4.09    | 1.31     | 0.321           | Gel    |
| 40              | 16.8    | 2.53     | 0.151           | Gel    |
| 60              | 31.4    | 3.05     | 0.0968          | Gel    |
| 80              | 72.5    | 4.63     | 0.0638          | Gel    |
| 100             | 83.8    | 5.30     | 0.0632          | Gel    |

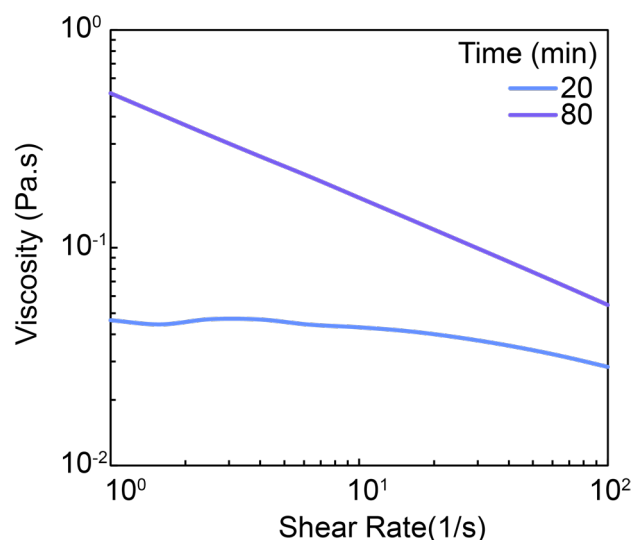

**Supporting Figure 2.** Rotational rheology of PEDOT:PSS-IL mixtures with 10 mg/mL IL. Representative plots of viscosity as a function of shear rate measured 20 and 80 minutes after mixing PEDOT:PSS with IL. Viscosity has increased ~92.3% at 100 1/s over the 60 min time period analyzed.

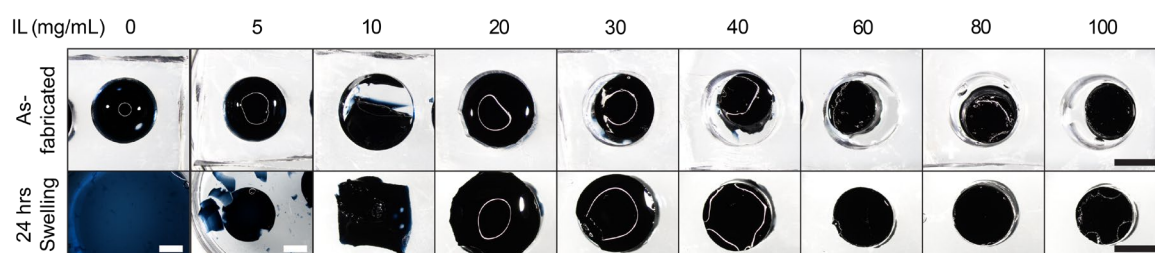

**Supporting Figure 3.** PEDOT:PSS hydrogels fabricated with 8 mg/mL PEDOT:PSS and nine IL concentrations were evaluated for stability after 24 hrs swelling in deionized water. N=2 per formulation. Representative images. Scale bars 5 mm; black scale bars apply to all images except those with a white scale bar.

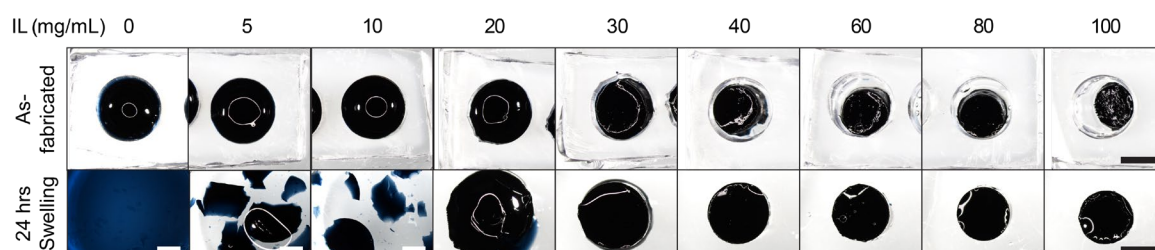

**Supporting Figure 4.** PEDOT:PSS hydrogels fabricated with 10 mg/mL PEDOT:PSS and nine IL concentrations were evaluated for stability after 24 hrs swelling in deionized water. N=2 per formulation. Representative images. Scale bars 5 mm; black scale bars apply to all images except those with a white scale bar.

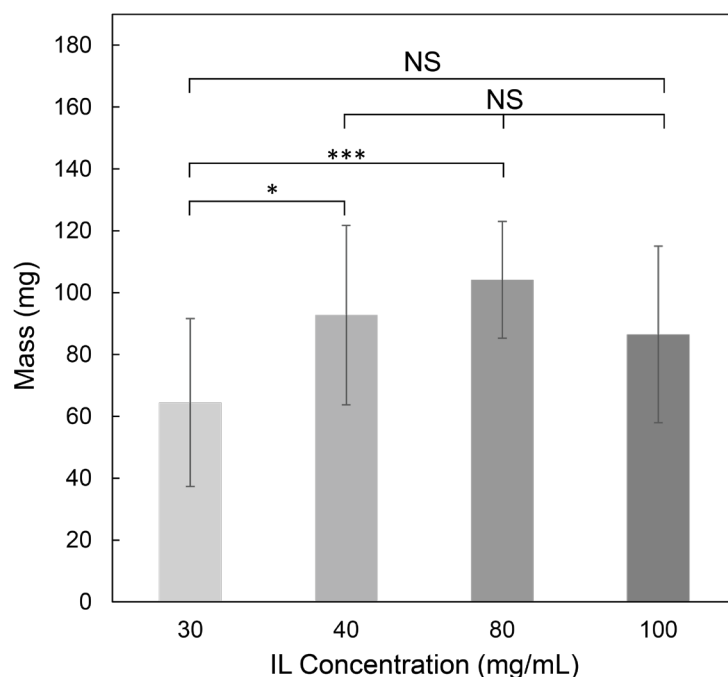

**Supporting Figure 5.** Masses (mg) of PEDOT:PSS hydrogels (12 mg/mL) after fabrication are less than the starting mass of the precursor mixture (~250 mg) due to water evaporation during oven incubation. The observed decreases correspond to mass losses of 58.3-74.2% of the starting mass. Mean and standard deviation presented.  $N \geq 8$  per concentration. One-way analysis of variance (ANOVA) and Tukey's multiple comparison test. \*\*\*\* $P \leq 0.0001$  \*\*\* $P \leq 0.001$  \*\* $P \leq 0.01$  \* $P \leq 0.05$  Non-Significant (NS)  $P > 0.05$ .

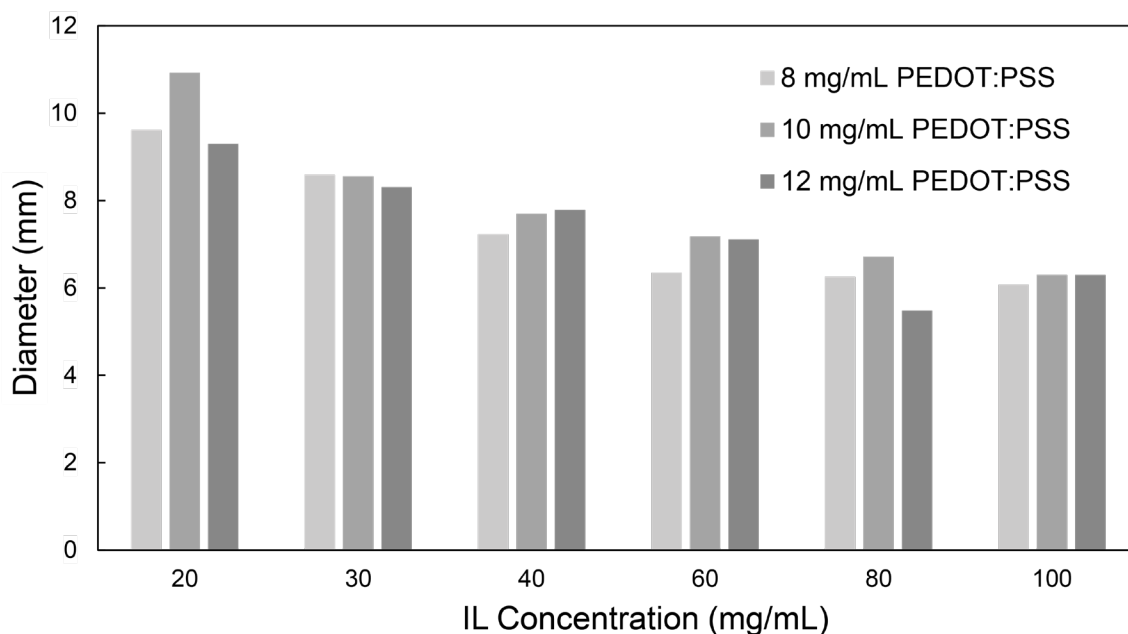

**Supporting Figure 6.** Hydrogel diameters at 24 hours swelling in deionized water were found to be similar for a given IL concentration across varying PEDOT:PSS concentrations.  $N=2$  per formulation, mean presented.

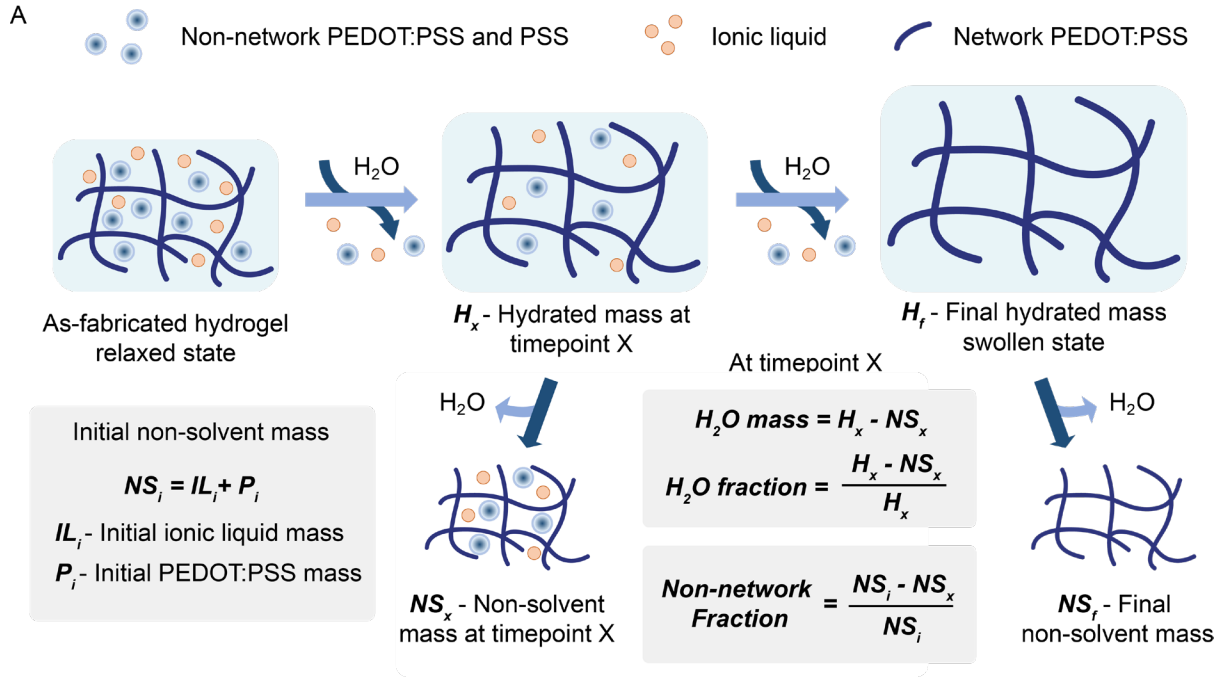

**B**

|            | % of final hydrated mass $H_f$ |                            | % of initial non-solvent mass $NS_i$  |                           |                                                       | % of initial PEDOT:PSS mass $P_i$             |
|------------|--------------------------------|----------------------------|---------------------------------------|---------------------------|-------------------------------------------------------|-----------------------------------------------|
| IL (mg/mL) | Water fraction<br>$H_f - NS_f$ | Polymer fraction<br>$NS_f$ | Non-network fraction<br>$NS_i - NS_f$ | Initial IL mass<br>$IL_i$ | Estimated PEDOT:PSS mass loss<br>$NS_i - NS_f - IL_i$ | Estimated PEDOT:PSS mass loss<br>$P_i - NS_f$ |
| 30         | 99.8                           | 0.179                      | 86.7                                  | 71.4                      | 15.2                                                  | 53.3                                          |
| 40         | 99.7                           | 0.330                      | 86.0                                  | 76.9                      | 9.06                                                  | 39.3                                          |
| 60         | 99.6                           | 0.418                      | 89.2                                  | 83.3                      | 5.83                                                  | 35.0                                          |
| 80         | 99.3                           | 0.714                      | 91.2                                  | 87.0                      | 4.25                                                  | 32.6                                          |
| 100        | 99.0                           | 0.993                      | 92.4                                  | 89.3                      | 3.10                                                  | 28.9                                          |

**Supporting Figure 7. Water and non-network fractions of PEDOT:PSS hydrogels are dependent on IL concentration.** A) Schematic and equations for calculating water mass, water fraction, and non-network fraction of hydrogels. At timepoint X, water mass is determined by taking the difference of hydrated mass  $H_x$  and non-solvent mass  $NS_x$ .  $NS_x$  is obtained from measuring lyophilized hydrogels. Water fraction is defined as the fraction of water mass to hydrated mass  $H_x$ . Non-network fraction is defined as the fraction of initial non-solvent mass  $NS_i$  that does not stay linked to the hydrogel network and is removed by washing. In this case, non-network fraction is expected to comprise of IL, excess PSS, and non-network PEDOT:PSS colloidal nanogels or larger aggregates. Initial solvent mass  $NS_i$  is the sum of initial ionic liquid mass  $IL_i$  and initial PEDOT:PSS mass  $P_i$ .  $NS_i$  was not directly measured but was assumed to be the same as that calculated from volumes and known concentrations. B) Table of mean values of final fractions and non-solvent mass changes of equilibrium swollen hydrogels fabricated with 30-100 mg/mL IL (in deionized water for at least 7 days, N=2-6 per concentration). Polymer fractions were calculated assuming that the non-solvent mass at day 7 was only network PEDOT:PSS.

**Supporting Table 3.** Table of values for elastic modulus and ultimate strength in compression as well as conductivity of PEDOT:PSS hydrogels. Mean and standard deviation presented. N $\geq$ 7 per group.

| Ionic Liquid Concentration (mg/mL) | Elastic Modulus (kPa) | Ultimate Strength (kPa) | Conductivity (S/m) |
|------------------------------------|-----------------------|-------------------------|--------------------|
| 30                                 | 1.05 $\pm$ 0.343      | 0.11 $\pm$ 0.055        | 2.75 $\pm$ 3.75    |
| 40                                 | 2.91 $\pm$ 1.59       | 0.38 $\pm$ 0.24         | 7.19 $\pm$ 5.24    |
| 80                                 | 4.10 $\pm$ 1.43       | 0.61 $\pm$ 0.42         | 52.2 $\pm$ 26.4    |
| 100                                | 4.13 $\pm$ 1.63       | 0.79 $\pm$ 0.49         | 127 $\pm$ 75.1     |

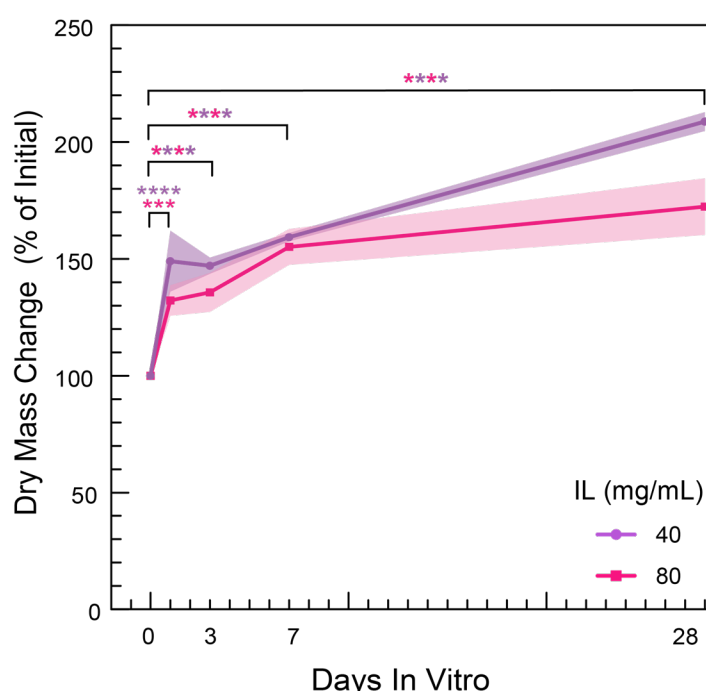

**Supporting Figure 8.** PEDOT:PSS hydrogels were fabricated with 40 and 80 mg/mL IL, washed, disinfected, and suspended in Dulbecco's Modified Eagle Medium (DMEM) with 10% fetal bovine serum (FBS) at 37 °C and 5% CO<sub>2</sub> for 28 days. Hydrogel dry mass (measured from lyophilized hydrogels) significantly increased in comparison to day 0 throughout the twenty-eight day period in both concentrations; 210% and 170% on day 28 in 40 mg/mL and 80 mg/mL, respectively. N=4 per concentration per time point. Plot lines denote mean and colored shaded areas denote standard deviation presented. One-way analysis of variance (ANOVA) and Dunnett's multiple comparison test with Day 0 as the control. \*\*\*\*P $\leq$ 0.0001 \*\*\*P $\leq$ 0.001 \*\*P $\leq$ 0.01 \*P $\leq$ 0.05 Non-Significant (NS) P $>$ 0.05. Asterisks of alternating colors indicate significance applies to both concentrations, while asterisks of one color are specific to the indicated concentration.

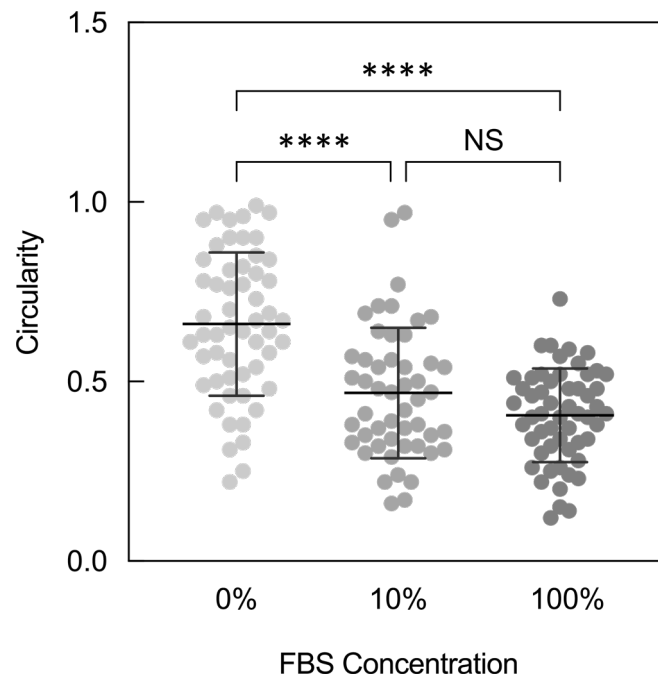

**Supporting Figure 9. Fibroblasts were more spread on hydrogels pre-conditioned with serum-containing media.** PEDOT:PSS hydrogels were fabricated with 80 mg/mL IL, and pre-conditioned with Dulbecco's Modified Eagle Medium (DMEM), 10% fetal bovine serum (FBS) in DMEM and 100% FBS. After overnight culture, circularities of normal human dermal fibroblasts (N>50 cells) on hydrogels pre-conditioned with 10% and 100% FBS were significantly lower compared to those on hydrogels pre-conditioned with DMEM alone. Circularity is determined by  $4\pi A/P^2$ , in which  $A$  is the cell area and  $P$  is the perimeter. A mathematically perfect circle has a value of 1. Mean and standard deviation presented. Two-way analysis of variance (ANOVA) and Šidák's multiple comparison test: \*\*\*\* $P \leq 0.0001$  \*\*\* $P \leq 0.001$  \*\* $P \leq 0.01$  \* $P \leq 0.05$  Non-Significant (NS)  $P > 0.05$ .

**Supporting Table 4.** Expansion of normal human dermal fibroblasts on tissue culture plastic (TCP) versus PEDOT:PSS hydrogels fabricated with 40 mg/mL or 80 mg/mL IL. Cell expansion is defined as the ratio of cell density to that of the previous time point. Day 1 cell density was compared to the initial seeding density (denoted as Day 0). N=1 TCP control per timepoint; N=3-4 hydrogels per condition per timepoint, mean and standard deviation presented.

| Substrates\Expansion              | Day 1/Day 0   | Day 3/Day 1  | Day 7/Day 3  | Day 7/Day 14 |
|-----------------------------------|---------------|--------------|--------------|--------------|
| Tissue culture plastic            | 1.21          | 4.22         | 3.39         | 1.19         |
| PEDOT:PSS hydrogel<br>40 mg/mL IL | 0.761 ± 0.330 | 6.46 ± 3.64  | 9.27 ± 2.85  | 1.02 ± 0.135 |
| PEDOT:PSS hydrogel<br>80 mg/mL IL | 1.05 ± 0.108  | 8.43 ± 0.987 | 5.78 ± 0.317 | 1.03 ± 0.103 |
